# Supplementary material for: Genomic Evidence for Formate Metabolism by Chloroflexi as the Key to Unlocking Deep Carbon in Lost City Microbial Ecosystems
Source: PubMed Central journal article supplement (PMC7117926; doi:10.1128/aem.02583-19), 2020-04-01
Supplement: AEM.02583-19-s0001.pdf [file AEM.02583-19-s0001.pdf]

# Supplemental Material for *Genomic Evidence for Formate Metabolism by Chloroflexi as the Key to Unlocking Deep Carbon in Lost City Microbial Ecosystems*

Julia M. McGonigle, Susan Q. Lang, William J. Brazelton

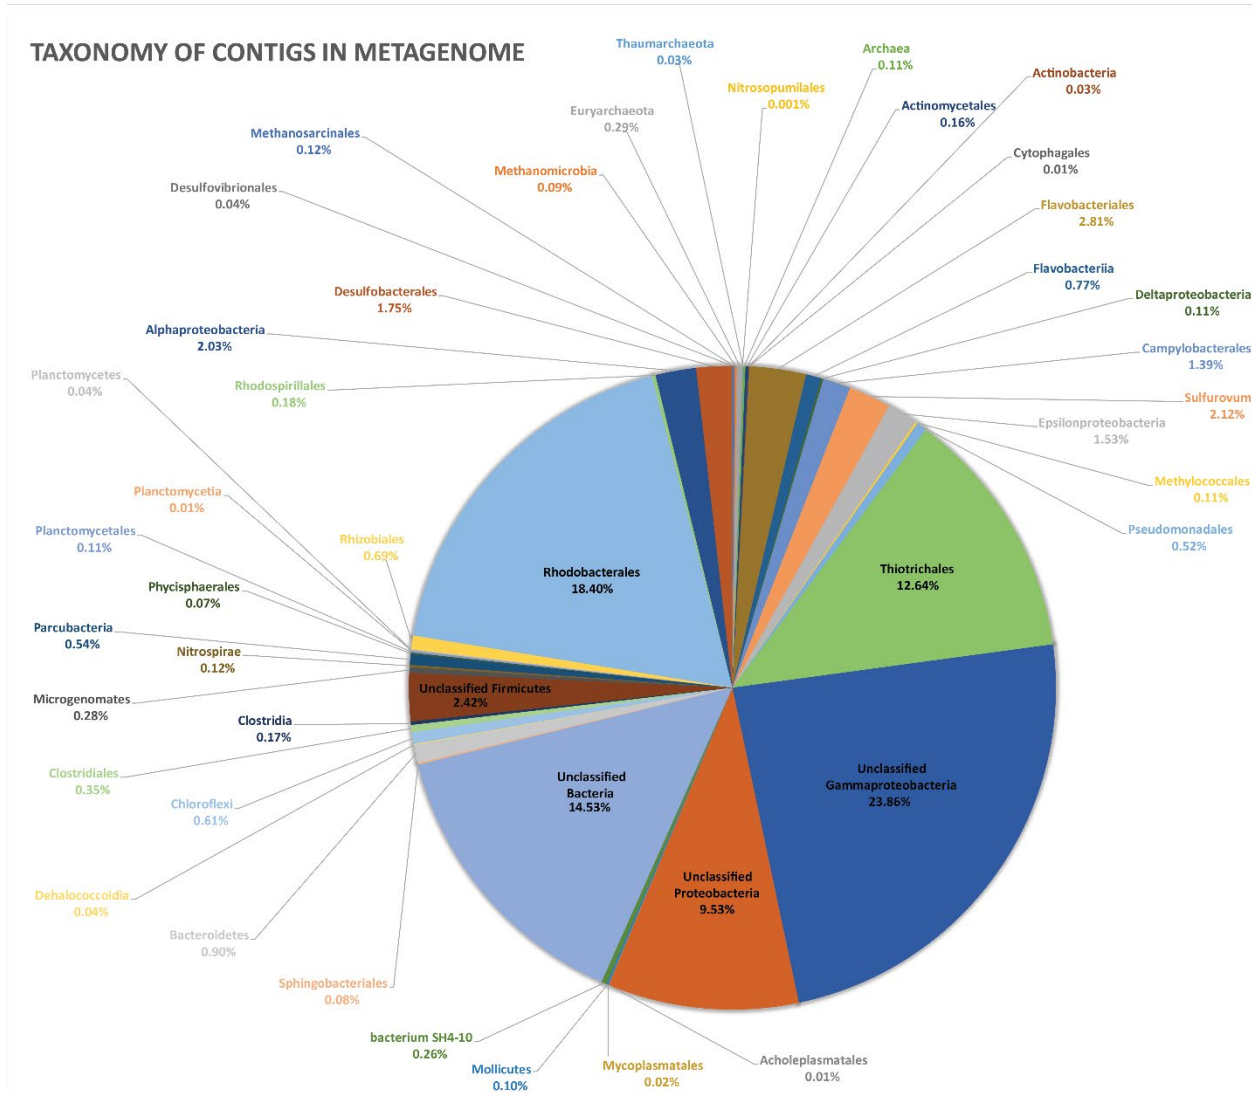

**Figure S1:** Coverage of assembled contigs from Lost City chimney sample near Marker 5, grouped by taxonomic assignments. PhyloPhyithiaS+ taxonomic consensus for each contig is reported at the level of order. Exceptions are *Sulfurovum* and contigs with unassigned order, where the lowest possible assignment is reported.

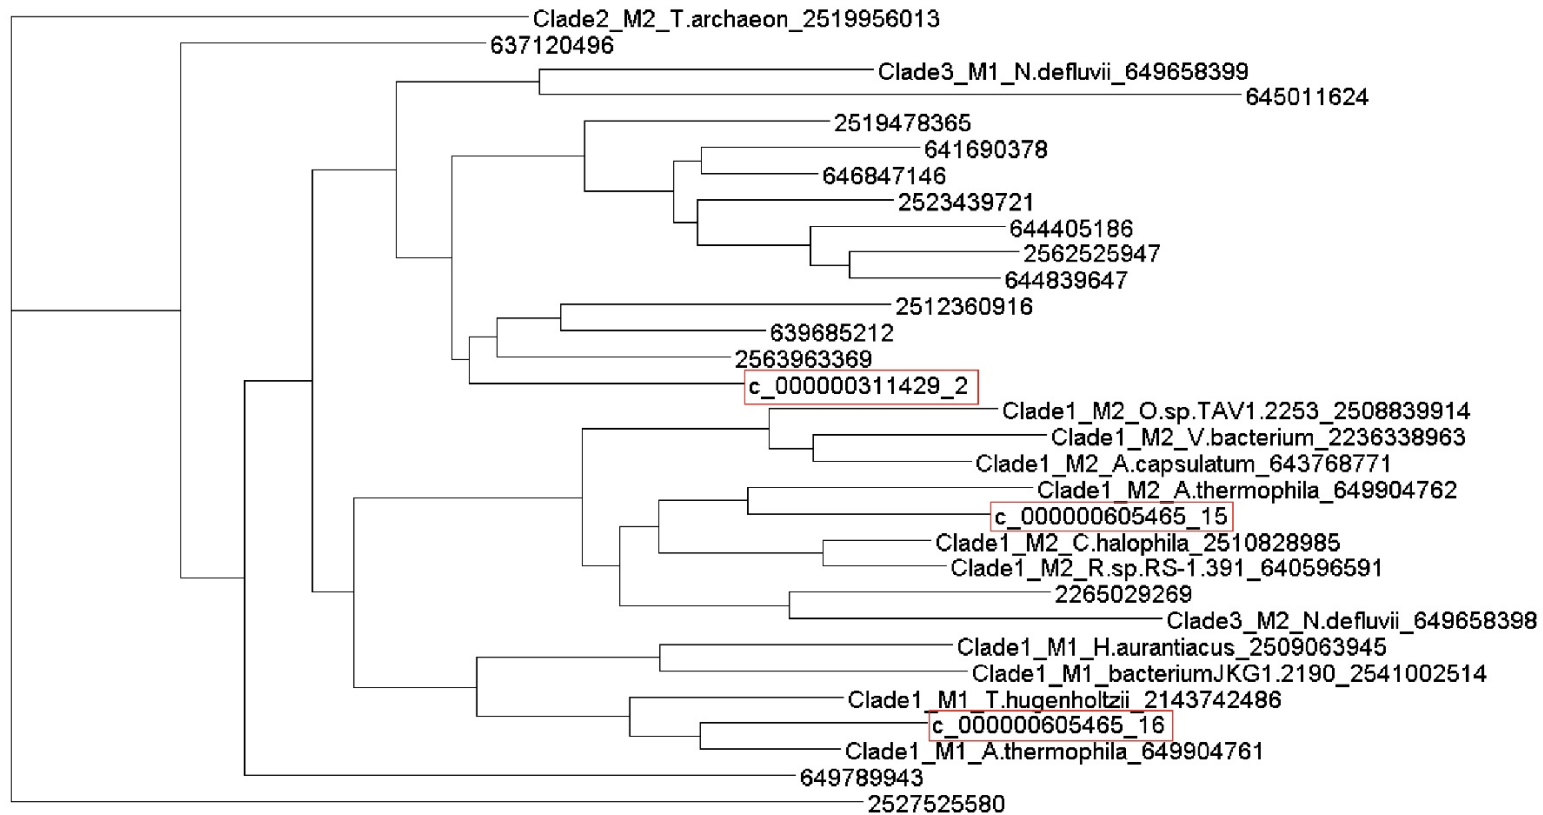

**Figure S2:** Phylogeny of the three *nuoM* sequences (boxed in red) found in the *Chloroflexi* MAG. The tree was built using RaxML from a subset of reference proteins published in Chadwick *et al.* (1) obtained from JGI's IMG database, accessed January 2020. Clade distinctions (Clade1\_M1, Clade1\_M2, Clade2\_M2, Clade3\_M1, Clade3\_M2) are identical to those identified by Chadwick *et al.* ID numbers are the IMG Gene ID.

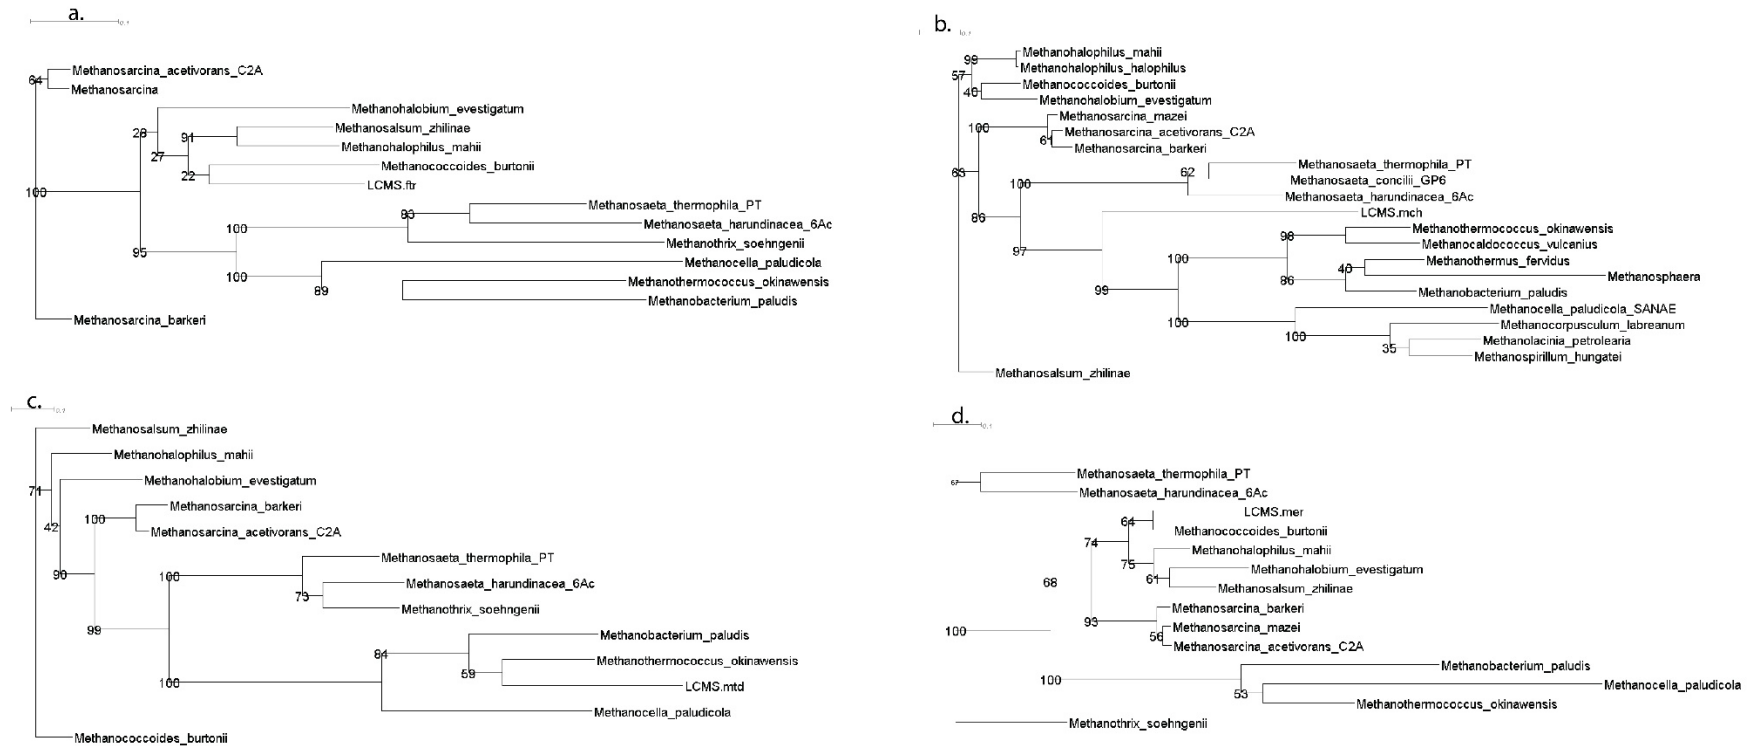

**Figure S3:** Phylogenetic trees of Lost City *Methanosarcinales* (LCMS) MAG genes in methanogenic pathways. **a.** formylmethanofuran-tetrahydromethanopterin formyltransferase (*ftr*), **b.**  $N^5N^{10}$ -methenyl-tetrahydromethanopterin cyclohydrolase (*mch*), **c.**  $F_{420}$ -dependent  $N^5N^{10}$ -methylene-tetrahydromethanopterin dehydrogenase (*mtd*), **d.** and  $F_{420}$ -dependent  $N^5N^{10}$ -methylene-tetrahydromethanopterin reductase (*mer*). Accession numbers for reference proteins can be found in Table S5.

| Bin Id | CheckM Marker Lineage | PhyloPhythes+ Taxonomic Consensus                         | BLAST for Ribosomal S15 Protein                          | % ID   | % Completeness | % Contamination | % of Assembly Coverage |
|--------|-----------------------|-----------------------------------------------------------|----------------------------------------------------------|--------|----------------|-----------------|------------------------|
| 20     | k__Bacteria (UID2565) | <i>Planctomycetes; Phycisphaera mikurensis</i>            | <i>Phycisphaera bacterium</i> (MAO22150.1)               | 67.42% | 84.09          | 1.14            | 0.37                   |
| 26     | k__Bacteria (UID203)  | <i>Epsilonproteobacteria; Sulfurovum/Sulfurospirillum</i> | NA                                                       | NA     | 27.93          | 1.72            | 0.14                   |
| 28     | k__Bacteria (UID203)  | <i>Proteobacteria</i>                                     | <i>Candidatus Gracilibacteria bacterium</i> (QFR39383.1) | 76.40% | 54.31          | 0.86            | 0.10                   |
| 33     | k__Bacteria (UID203)  | <i>Proteobacteria</i>                                     | <i>candidate division WOR-3 bacterium</i> (OYD15091.1)   | 68.97% | 91.38          | 6.11            | 0.84                   |
| 30     | k__Bacteria (UID203)  | No consensus                                              | <i>Candidatus Acetothermia bacterium</i> (HCP32314.1)    | 80%    | 63.71          | 9.48            | 0.62                   |
| 32     | k__Bacteria (UID203)  | No consensus                                              | <i>Nitrospiraceae bacterium</i> (HCZ11968.1)             | 71.55% | 18.79          | 0               | 0.05                   |
| 36     | k__Bacteria (UID203)  | <i>Gammaproteobacteria</i>                                | <i>Candidatus Gracilibacteria bacterium</i> (QFR39383.1) | 77.53% | 46.11          | 1.57            | 0.06                   |

**Table S1:** Taxonomic assignment of MAGs greater than 18% complete and under 10% contamination as determined by CheckM for Lost City chimney sample from Marker 5. PhyloPhythes+ taxonomic consensus for contigs is reported at the deepest observed level if one third or more of the contigs in the MAG were assigned the same taxonomic grouping. The BLAST search was done using the NCBI nr database; hit with highest percent identities is reported.

|                                      | <b>Chloroflexi<br/>MAG</b> | <b>Sulfurovum<br/>MAG</b> | <b>LCMS<br/>MAG</b> |
|--------------------------------------|----------------------------|---------------------------|---------------------|
| <b>% Completion</b>                  | 70                         | 95.9                      | 84.87               |
| <b>% Contamination</b>               | 4.73                       | 2.19                      | 5.26                |
| <b># contigs (&gt;= 0 bp)</b>        | 300                        | 82                        | 385                 |
| <b># contigs (&gt;= 1000 bp)</b>     | 9                          | 82                        | 379                 |
| <b># contigs (&gt;= 5000 bp)</b>     | 265                        | 72                        | 191                 |
| <b># contigs (&gt;= 10000 bp)</b>    | 172                        | 62                        | 43                  |
| <b># contigs (&gt;= 25000 bp)</b>    | 48                         | 30                        | 4                   |
| <b># contigs (&gt;= 50000 bp)</b>    | 2                          | 9                         | 0                   |
| <b>Total length (&gt;= 0 bp)</b>     | 4327445                    | 1944029                   | 2369335             |
| <b>Total length (&gt;= 1000 bp)</b>  | 4327445                    | 1944029                   | 2366329             |
| <b>Total length (&gt;= 5000 bp)</b>  | 4178990                    | 1908505                   | 1661266             |
| <b>Total length (&gt;= 10000 bp)</b> | 3489585                    | 1835568                   | 645388              |
| <b>Total length (&gt;= 25000 bp)</b> | 1558923                    | 1334736                   | 106887              |
| <b>Total length (&gt;= 50000 bp)</b> | 133530                     | 563213                    | 0                   |
| <b>Largest contig</b>                | 67383                      | 108728                    | 29121               |
| <b>N50</b>                           | 18477                      | 37169                     | 6717                |
| <b>total protein-encoding genes</b>  | 3936                       | 2036                      | 2324                |
| <b># KEGG annotated genes</b>        | 3316                       | 1838                      | 1796                |
| <b># genes no annotation</b>         | 620                        | 198                       | 528                 |
| <b># complete KEGG modules</b>       | 33                         | 53                        | 33                  |
| <b># incomplete KEGG modules</b>     | 39                         | 24                        | 28                  |
| <b>% of Assembly Coverage</b>        | 0.62                       | 0.41                      | 4.41                |

**Table S2:** Assembly quality statistics for each MAG.

| <b><i>nifH</i> Clone ID</b> | <b>contigID</b> | <b>% ID</b> | <b>Alignment Length (bp)</b> |
|-----------------------------|-----------------|-------------|------------------------------|
| 1537.15                     | c_000000344721  | 97.15       | 386                          |
| L74                         | c_000000344721  | 95.87       | 387                          |
| 1537.102                    | c_000000344721  | 98.19       | 387                          |
| 1537.52                     | c_000000344721  | 95.87       | 387                          |
| L7                          | c_000000344721  | 96.38       | 387                          |

**Table S3:** BLAST results for previously sequenced *nifH* genes.

| <b><i>mcrA</i> Clone ID</b> | <b>contigID</b> | <b>% ID</b> | <b>Alignment Length (bp)</b> |
|-----------------------------|-----------------|-------------|------------------------------|
| LCM1443-49                  | c_000000702168  | 98.90       | 726                          |
| LCM1228-3                   | c_000000702168  | 99.18       | 728                          |
| LCM1404-22                  | c_000000702168  | 96.80       | 719                          |

**Table S4:** BLAST results for previously sequenced *mcrA* genes.

| <b>Enzyme</b> | <b>Accession number</b> | <b>Organism</b>                             |
|---------------|-------------------------|---------------------------------------------|
| Ftr           | Mhar_2214               | <i>Methanosaeta harundinacea</i> 6Ac        |
| Ftr           | YP_004383947            | <i>Methanosaeta concilii</i> GP6            |
| Ftr           | YP_844050               | <i>Methanosaeta thermophila</i> PT          |
| Ftr           | NP_614984               | <i>Methanosarcina acetivorans</i> C2A       |
| Ftr           | YP_304532               | <i>Methanosarcina barkeri</i> Fusaro        |
| Ftr           | NP_633345               | <i>Methanosarcina mazei</i> Go1             |
| Ftr           | YP_566370               | <i>Methanococcoides burtonii</i> DSM 6242   |
| Ftr           | YP_003727460            | <i>Methanohalobium evestigatum</i> Z-7303   |
| Ftr           | YP_003543165            | <i>Methanohalophilus mahii</i> DSM 5219     |
| Ftr           | YP_004617074            | <i>Methanosalsum zhilinae</i> DSM 4017      |
| Ftr           | YP_004521004            | <i>Methanobacterium</i> sp. SWAN-1          |
| Ftr           | YP_003356088            | <i>Methanocella paludicola</i> SANAE        |
| Ftr           | YP_004575931            | <i>Methanothermococcus okinawensis</i> IH1  |
| Mch           | Mhar_2174               | <i>Methanosaeta harundinacea</i> 6Ac        |
| Mch           | YP_004383804            | <i>Methanosaeta concilii</i> GP6            |
| Mch           | YP_842689               | <i>Methanosaeta thermophila</i> PT          |
| Mch           | NP_616637               | <i>Methanosarcina acetivorans</i> C2A       |
| Mch           | YP_305738               | <i>Methanosarcina barkeri</i> Fusaro        |
| Mch           | NP_634677               | <i>Methanosarcina mazei</i> Go1             |
| Mch           | YP_565374               | <i>Methanococcoides burtonii</i> DSM 6242   |
| Mch           | YP_003727251            | <i>Methanohalobium evestigatum</i> Z-7303   |
| Mch           | YP_003542289            | <i>Methanohalophilus mahii</i> DSM 5219     |
| Mch           | YP_004616412            | <i>Methanosalsum zhilinae</i> DSM 4017      |
| Mch           | YP_004519292            | <i>Methanobacterium</i> sp. SWAN-1          |
| Mch           | YP_003247696            | <i>Methanocaldococcus vulcanius</i> M7      |
| Mch           | YP_003356187            | <i>Methanocella paludicola</i> SANAE        |
| Mch           | YP_001029842            | <i>Methanocorpusculum labreanum</i> Z       |
| Mch           | YP_003893284            | <i>Methanoplanus petrolearius</i> DSM 11571 |
| Mch           | YP_448258               | <i>Methanosphaera stadtmanae</i> DSM 3091   |
| Mch           | YP_501925               | <i>Methanospirillum hungatei</i> JF-1       |
| Mch           | YP_004577331            | <i>Methanothermococcus okinawensis</i> IH1  |
| Mch           | YP_004003819            | <i>Methanothermus fervidus</i> DSM 2088     |
| Mer           | Mhar_0856               | <i>Methanosaeta harundinacea</i> 6Ac        |
| Mer           | YP_004384673            | <i>Methanosaeta concilii</i> GP6            |
| Mer           | YP_842643               | <i>Methanosaeta thermophila</i> PT          |
| Mer           | NP_618605               | <i>Methanosarcina acetivorans</i> C2A       |
| Mer           | YP_303818               | <i>Methanosarcina barkeri</i> Fusaro        |

|     |              |                                            |
|-----|--------------|--------------------------------------------|
| Mer | NP_632652    | <i>Methanosarcina mazei</i> Go1            |
| Mer | YP_566974    | <i>Methanococcoides burtonii</i> DSM 6242  |
| Mer | YP_003727762 | <i>Methanohalobium evestigatum</i> Z-7303  |
| Mer | YP_003542654 | <i>Methanohalophilus mahii</i> DSM 5219    |
| Mer | YP_004615267 | <i>Methanosalsum zhilinae</i> DSM 4017     |
| Mer | YP_004520699 | <i>Methanobacterium</i> sp. SWAN-1         |
| Mer | YP_003357736 | <i>Methanocella paludicola</i> SANAE       |
| Mer | YP_004575971 | <i>Methanothermococcus okinawensis</i> IH1 |
| Mtd | Mhar_1470    | <i>Methanosaeta harundinacea</i> 6Ac       |
| Mtd | YP_004383615 | <i>Methanosaeta concilii</i> GP6           |
| Mtd | YP_843238    | <i>Methanosaeta thermophila</i> PT         |
| Mtd | NP_619291    | <i>Methanosarcina acetivorans</i> C2A      |
| Mtd | YP_304643    | <i>Methanosarcina barkeri</i> Fusaro       |
| Mtd | NP_619291    | <i>Methanosarcina mazei</i> Go1            |
| Mtd | YP_565622    | <i>Methanococcoides burtonii</i> DSM 6242  |
| Mtd | YP_003727361 | <i>Methanohalobium evestigatum</i> Z-7303  |
| Mtd | YP_003541849 | <i>Methanohalophilus mahii</i> DSM 5219    |
| Mtd | YP_004615335 | <i>Methanosalsum zhilinae</i> DSM 4017     |
| Mtd | YP_004518857 | <i>Methanobacterium</i> sp. SWAN-1         |
| Mtd | YP_003356368 | <i>Methanocella paludicola</i> SANAE       |
| Mtd | YP_004576424 | <i>Methanothermococcus okinawensis</i> IH1 |

**Table S5:** Accession numbers for reference proteins used in Figure S2.

**Dataset S1:** DatasetS1.xlsx - Complete and incomplete KEGG modules for the *Methanosarcinales*, *Sulfurovum*, *Chloroflexi* MAGs.
